# Supplementary material for: Genes adapt to outsmart gene targeting strategies in mutant mouse strains by skipping exons to reinitiate transcription and translation
Source: bioRxiv or medRxiv preprint supplement (doi:10.1101/2020.04.22.041087), 2020-04-23

**Supplementary Figure 1.**

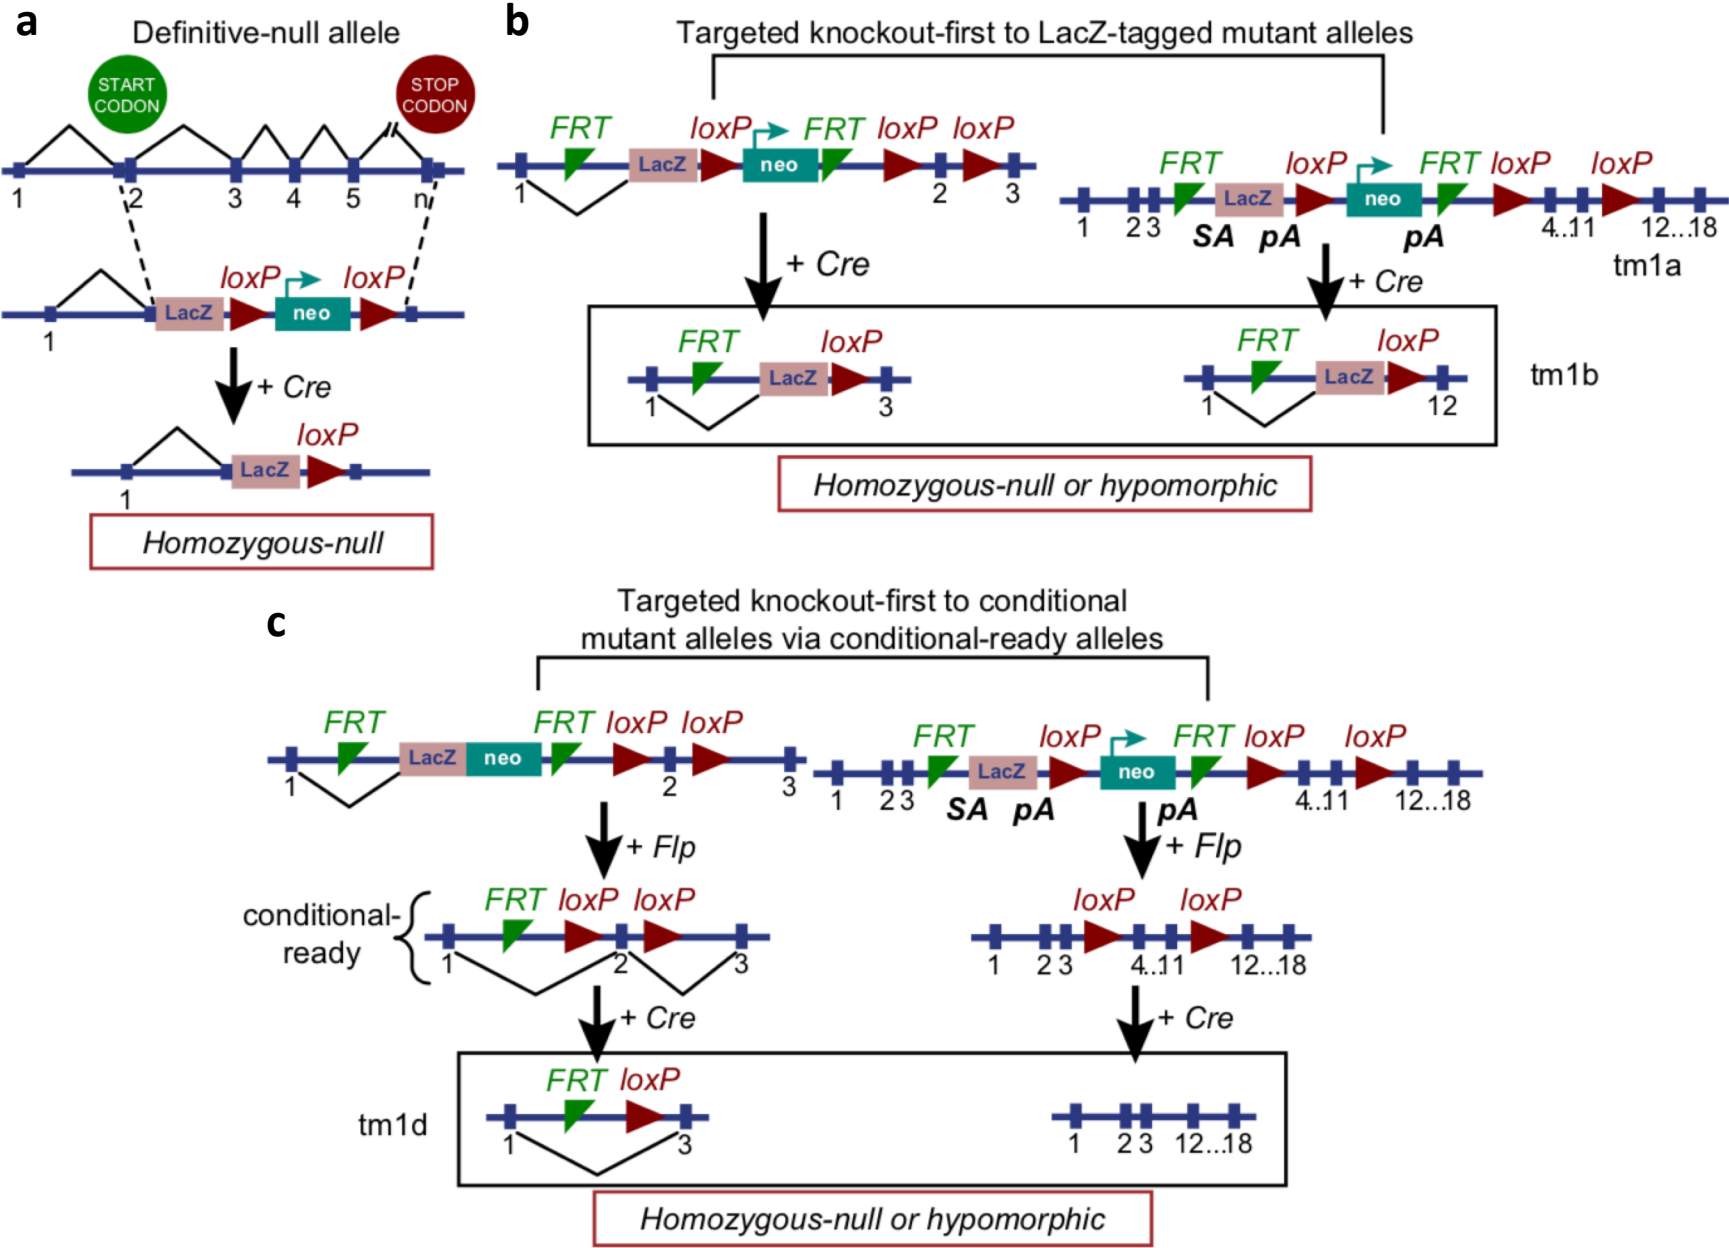

**Supplementary Figure 2.**

**a**

|       | <i>Rhbdf1</i> <sup>+/+</sup><br><i>Rhbdf2</i> <sup>-/-</sup> | <i>Rhbdf1</i> <sup>-/-</sup><br><i>Rhbdf2</i> <sup>-/-</sup> | <i>Rhbdf1</i> <sup>-/-</sup><br><i>Rhbdf2</i> <sup>-/-</sup> |
|-------|--------------------------------------------------------------|--------------------------------------------------------------|--------------------------------------------------------------|
|       | Number (%)<br>Expected<br>25%                                | Number (%)<br>Expected<br>50%                                | Number (%)<br>Expected<br>25%                                |
| e9.5  | 4 (29%)                                                      | 8 (57%)                                                      | <b>2 (14%)</b>                                               |
| e10.5 | 1 (4%)                                                       | 18 (75%)                                                     | <b>5 (21%)</b>                                               |
| e12.5 | 5 (42%)                                                      | 6 (50%)                                                      | <b>1 (8%)</b>                                                |
| e13.5 | 8 (40%)                                                      | 9 (45%)                                                      | <b>3 (15%)</b>                                               |
| e14.5 | 4 (44%)                                                      | 4 (44%)                                                      | <b>1 (11%)</b>                                               |
| e15.5 | 2 (25%)                                                      | 1 (12.5%)                                                    | <b>5 (62.5%)</b>                                             |
| e17.5 | 2 (33%)                                                      | 2 (33%)                                                      | <b>2 (33%)</b>                                               |
| e18.5 | 5 (33%)                                                      | 9 (60%)                                                      | <b>1 (7%)</b>                                                |
| P1-3  | 6 (23%)                                                      | 16 (61%)                                                     | <b>4 (15%)</b>                                               |
| >P4   | 9 (24%)                                                      | 29 (76%)                                                     | <b>0</b>                                                     |

**b**

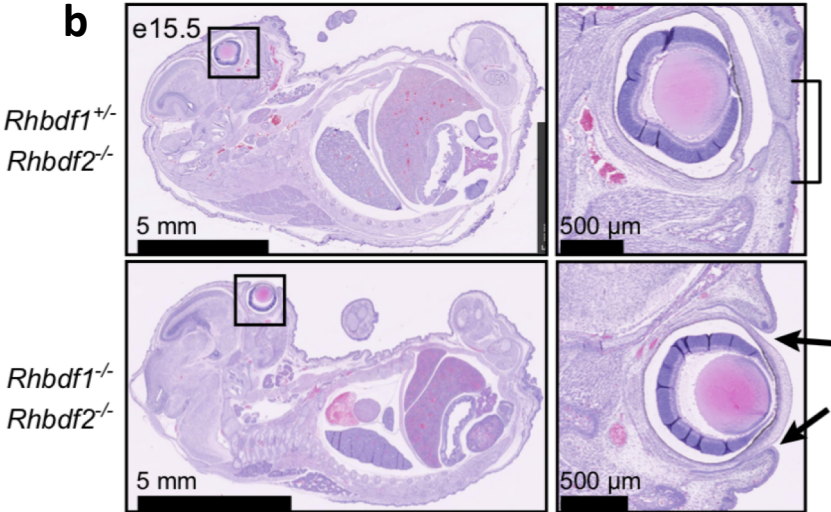

**c**

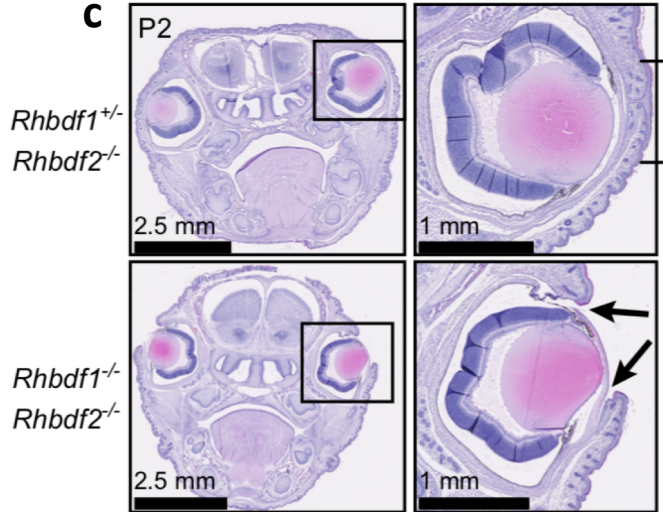

## Supplementary Figure 3

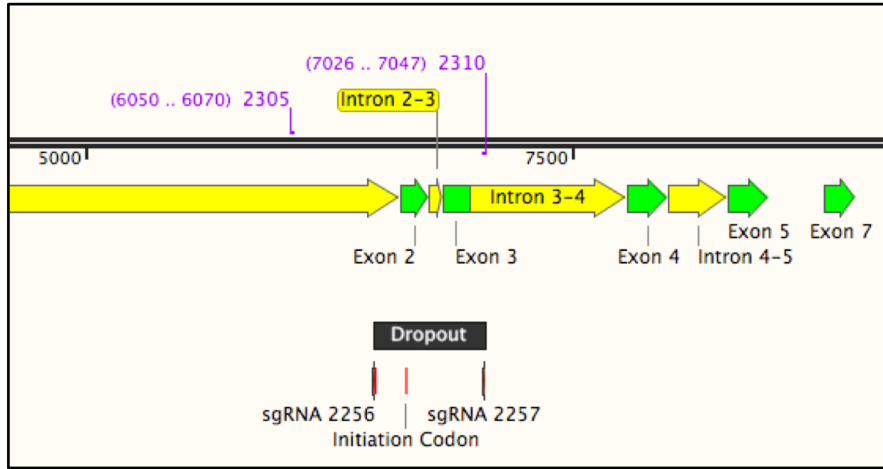

2256 sgRNA GGAGGATCTGTGGAGTTC

2257 sgRNA GAATCCCTGTTAGGTACC

2305 Forward AAGGAGAGTCCTCTGCATACT

2310 Reverse ACCTAACAGGGATTCTGTATGC

### Phusion High-Fidelity PCR

| CYCLE STEP           | CYCLES | TEMP | TIME       |
|----------------------|--------|------|------------|
| Initial denaturation | 1      | 98°C | 30 seconds |
| Denaturation         | 30     | 98°C | 10 seconds |
| Annealing            |        | 72°C | 30 seconds |
| Extension            |        | 72°C | 1 minute   |
| Final extension      | 1      | 72°C | 5 minutes  |
| Hold                 | 1      | 4°C  | ∞          |

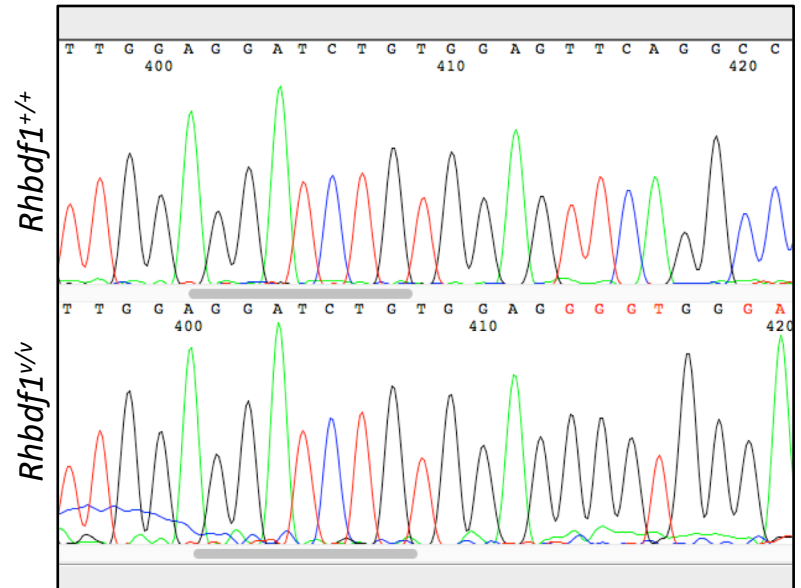

Wildtype sequence TTGTTGGAGGATCTGTGGAGTTCAGGCCAGAGCATGCCA

Mutant sequence TTGTTGGAGGATCTGTGGAG-GGGTGGGAATGGGGCAAAGG

Supplementary Figure 4

a

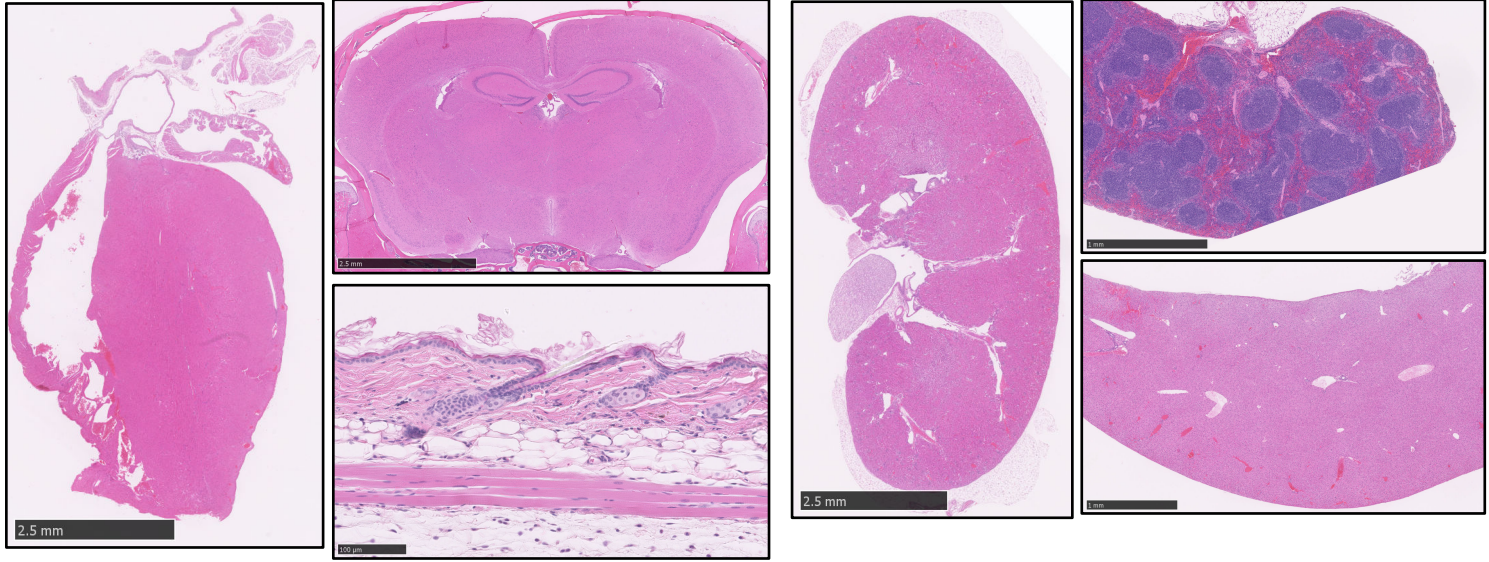

b

Splice variants of *Rhbf1*<sup>v/v</sup>

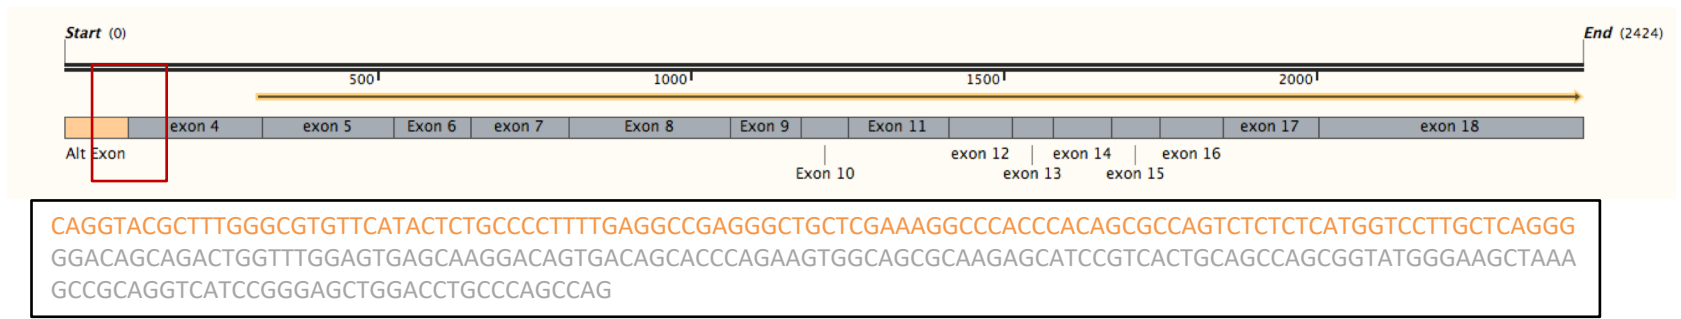

| Transcript variant | NCBI Reference Sequence        |
|--------------------|--------------------------------|
| X1                 | <a href="#">XM_011243658.2</a> |
| X2                 | <a href="#">XM_006514494.4</a> |
| X3                 | <a href="#">XM_006514495.4</a> |
| X4                 | <a href="#">XM_006514496.3</a> |
| X9                 | <a href="#">XR_872202.2</a>    |
| X14                | <a href="#">XR_001779873.2</a> |



Supplementary Figure 5

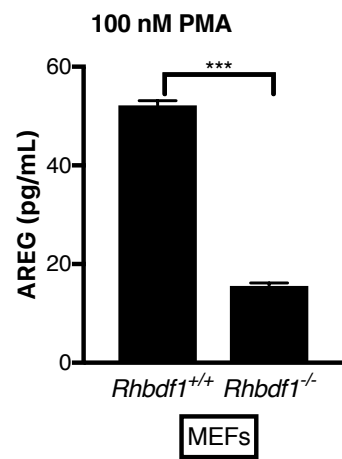

Supplementary Figure 6

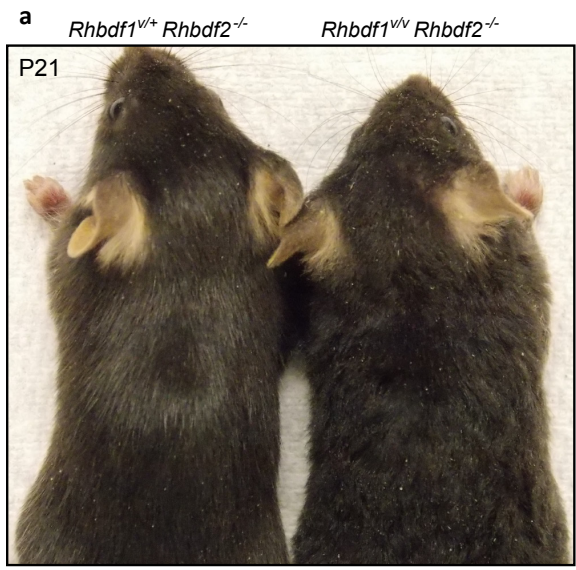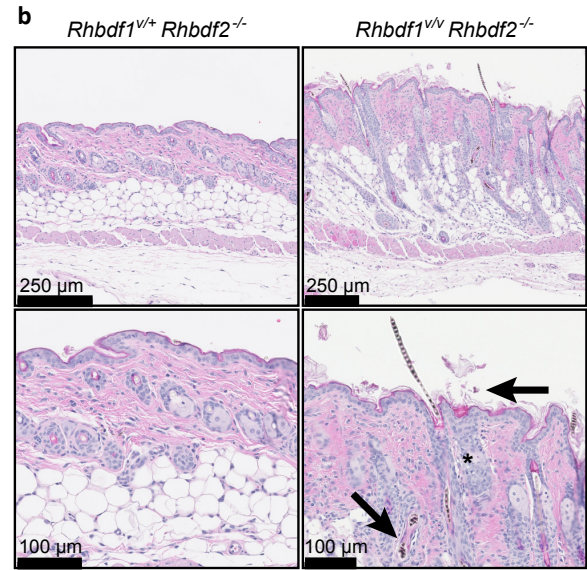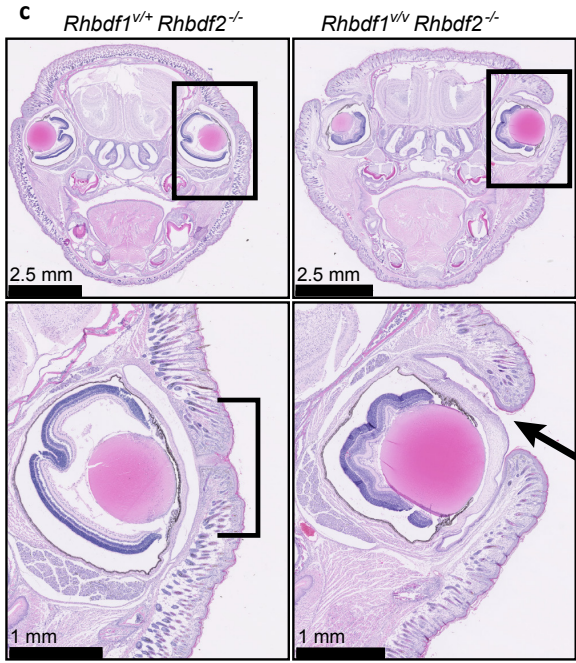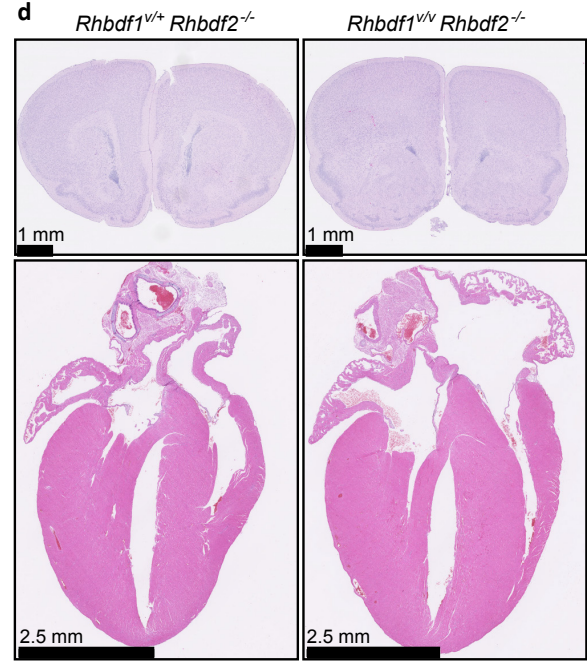

**a**

**Transcript: Mouse *Rhbdf1*-206 ENSMUST00000143988**

R<sub>P</sub>CCIGTKGRCEITSREYCDFMRGYFHEEATLCSQVHCMDDVCGLLPFLNPMTVLRDLEKLAGWHRIAIYLLSGITGNLASAIFLPYRAEIVGPAGSQFGILACLFVELFQ  
SWQILARPWRAFFKLLAVVLFLEAFGLLPWIDNFAHISGFVSGFLFSFAFLPYISFGKFDLYRKRCQIIIFQVVFLGLLAGLVVLFYFYPVRCWECEFLTICIPFTDKFCEKYELD  
AQLH\*

**Transcript: Human *RHBDF1*-205 ENST00000448893**

R<sub>P</sub>CCIGTKGRCEITSREYCDFMRGYFHEEATLCSQVHCMDDVCGLLPFLNPMTVLRDLEKLAGWHRIAIYLLSGVTGNLASAIFLPYRAEIVGPAGSQFGILACLFVELFQ  
SWQILARPWRAFFKLLAVVLFLEFTFGLLPWIDNFAHISGFISGLFLSFAFLPYISFGKFDLYRKRCQIIIFQVVFLGLLAGLVVLFYVYPVRCWECEFLTICIPFTDKFCEKYELDA  
QLH\*

**b**

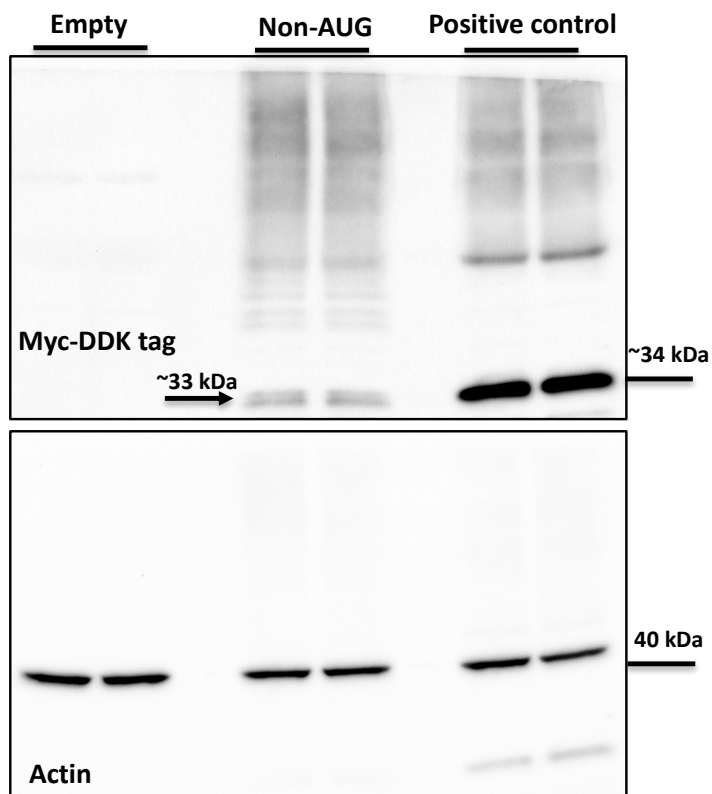

# Supplementary Figure 8

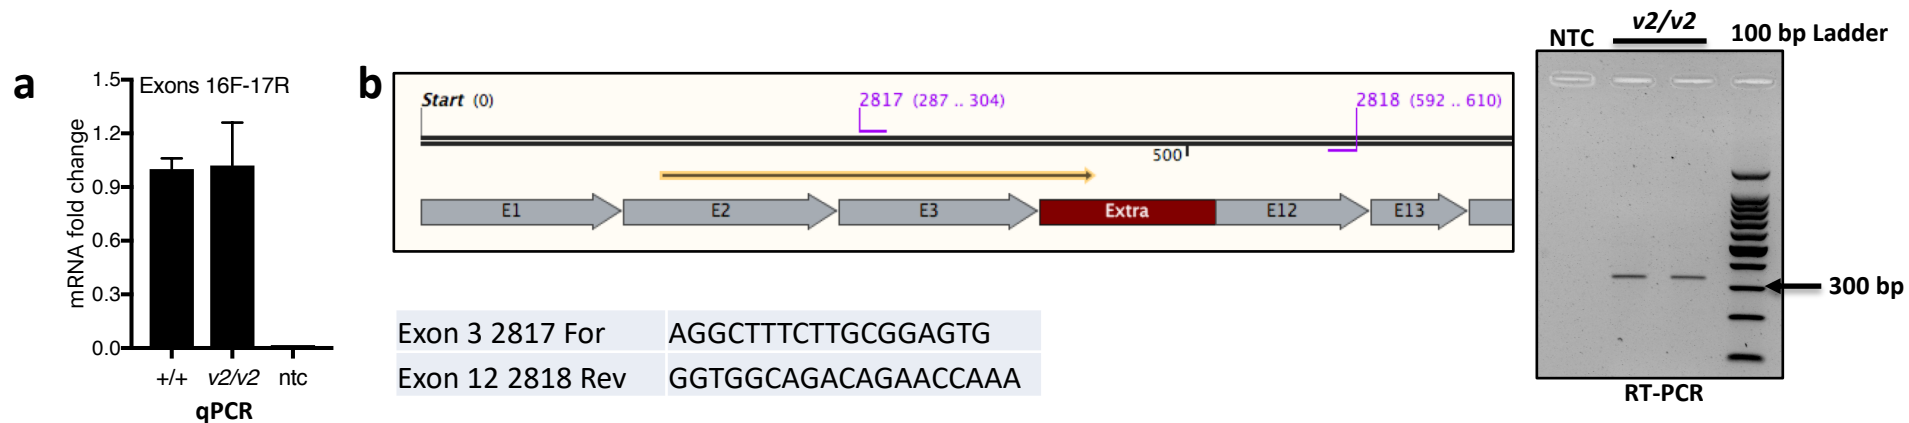

**c**

**AGGCTTTCTTGCGGAGTG**TGAGTATGCCAGCTGAGACAGCCCGGGTCCCATCACCCCACCATGAGCCTCGCCGGCTGGTGCT  
 GCAGCGTCAGACATCCATCACACAGACCATCCGCAG**GTCCCAGGTCCCGAAAACCAAAGAAGAACCCTAACAAAGAGG**  
**ACAAGCGGCCTCGCACAGCCTTCACTGCTGAGCAGCTCCAGAGGCTCAAGGCTGAGTTTCAGACCAACAGTCCACGTTGTC**  
 GGTGTGGGTGAAGTGGCCCGTTCATCCTAGTGCCCCAGACCTTGCAGGCAACAAGAGACAG**TTTGTTCTGTCTGCCACC**

**Bold: Primers 2817/2818**

Extra: *En2* splice acceptor sequence from the targeted KO-first cassette

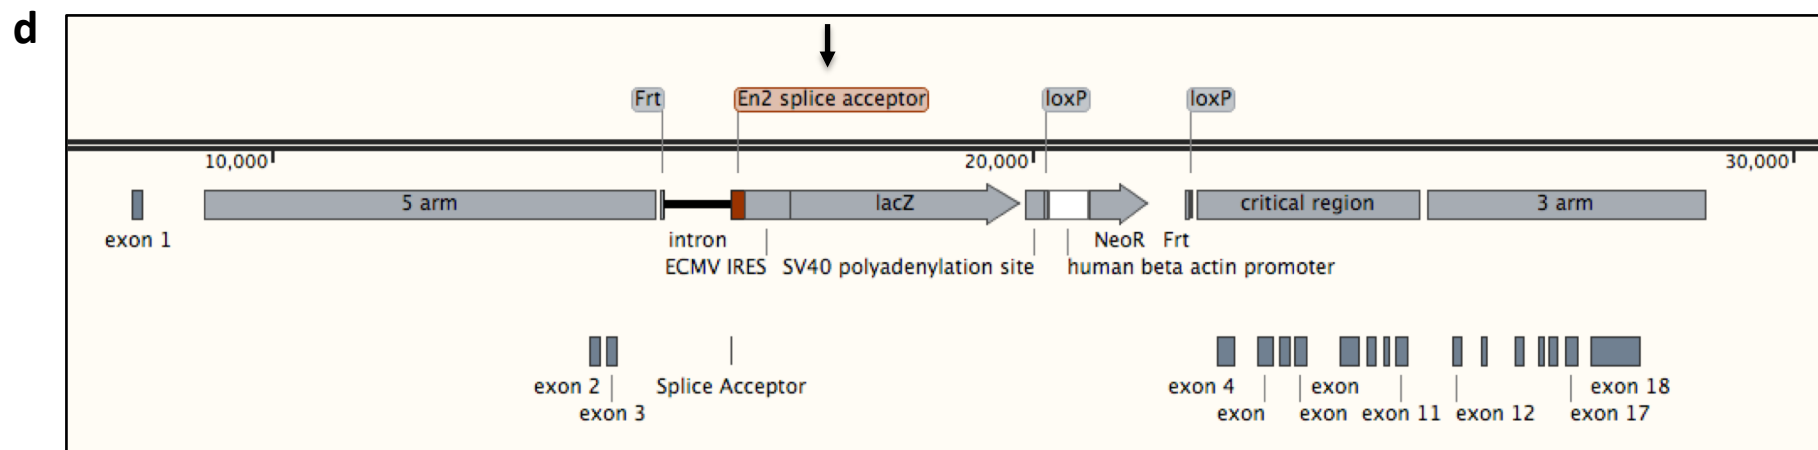

**e**

Putative 10.8 kDa truncated protein sequence:  
 MSEARRDSTSSLQRKKPPWLKLDIPAAVPPAAEEPSFLQPLRRQAFILRSVSMPTARVPSPHHEPRRLVLQRQTSITQTIRRSQVPKTKEEP\*

**a**

*Rhbd1* targeted KO-first allele

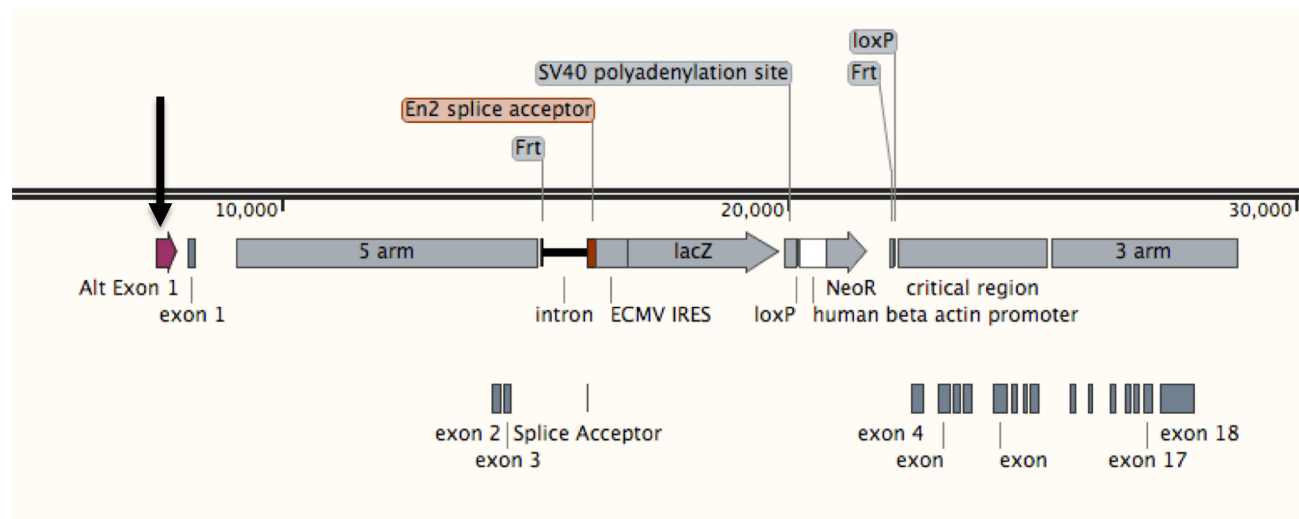

**b**

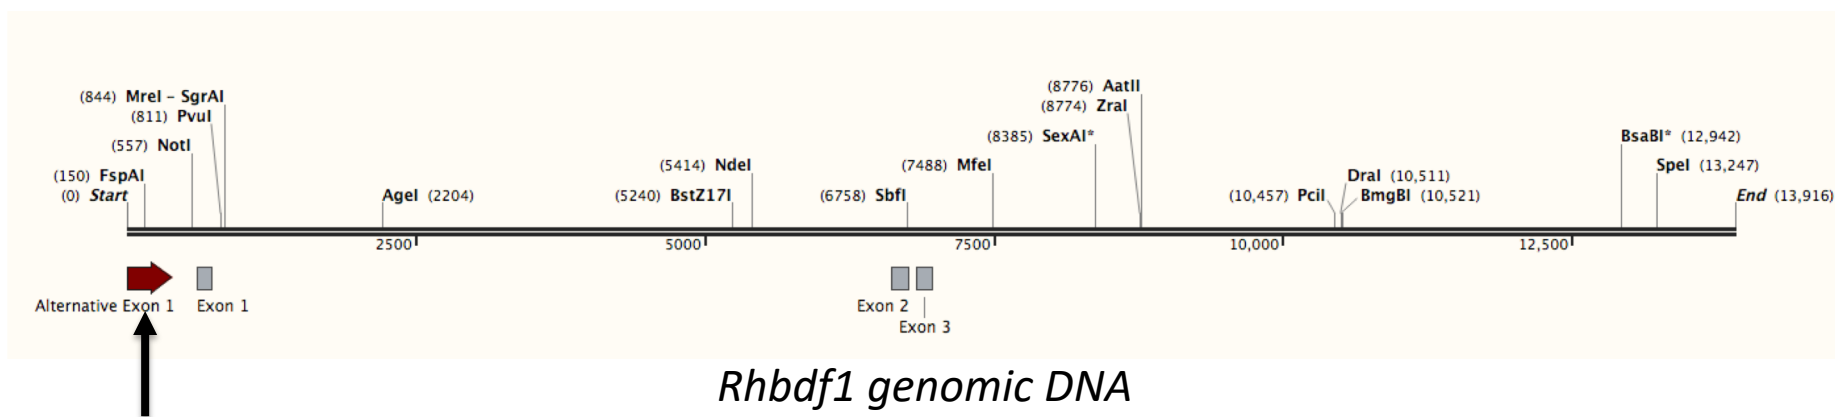

Alternative exon 1 sequence:

```
tgtacctgctgggaaagaagtaggggaaggggtaattgctgagctgcggtcctgtgaaatggtgtatcagtgtatgaacgtgagtgtgcacactataaatgtgtagggtagag
agtgtgagcccatggaagtgcattttgaataggtgtgcgcacgtgtctgtgtaaacaggtgcgagaggcctgaatgcatgaatgtttgtagaaagatcaggcgctgtgcacagg
acaagtgagagcttcgggacctcagtgatgtgccagtgctgccttcggaaggggcttcaatctgccttttaggtccctccacgccaccctcttgcctttggaggtccccttctc
tctccaagcacaggggcagcacaagatgaaggagtatggaaaggcgagtcca
```



# Supplementary Figure 10

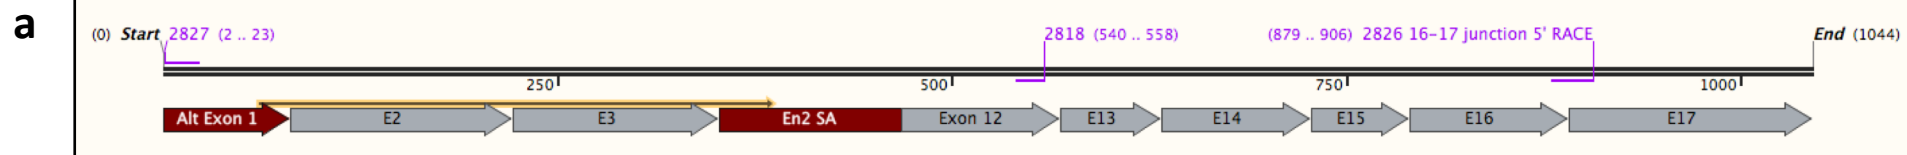

Putative 12.3 kDa truncated protein sequence:

MVYQCMNACLTAPGMTSEARRDSTSSLQRKKPPWLKLDIPAAVPPAAEEPSFLQPLRRQAFILRSVSMPAETARVPSPHHEPRLVLQRQTSITQTIRRSQVPKT  
KEEP\*

**b**

|              |                                             |
|--------------|---------------------------------------------|
| 2827 F       | GTACCTGCTGGGAAAGAAGTAG                      |
| 2818 R       | GGTGGCAGACAGAACCAAA                         |
| 2826 5' RACE | GATTACCCAAGCTT CAAGCAGTGCAGGATCCCAGCGTGCAGG |

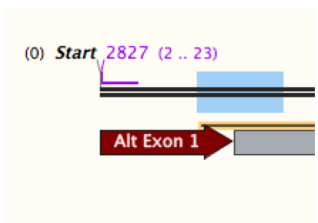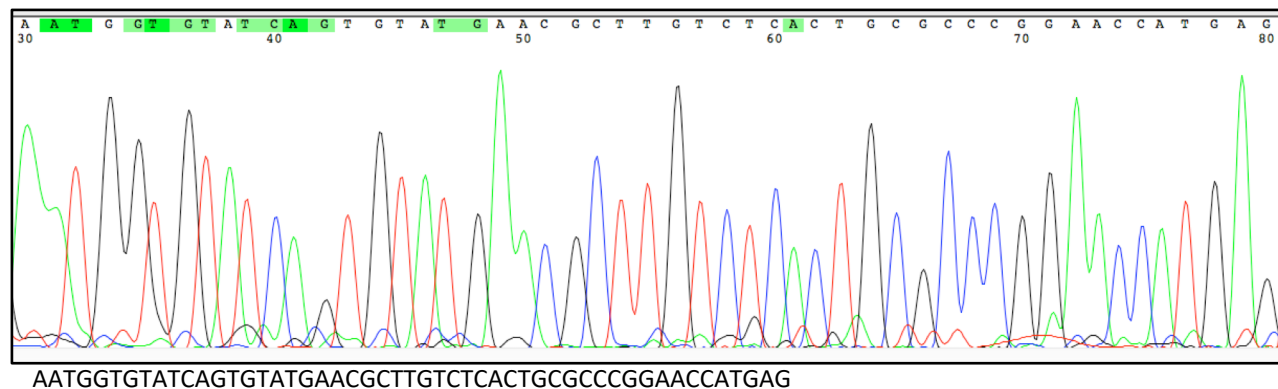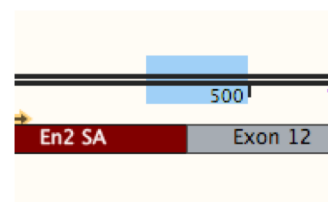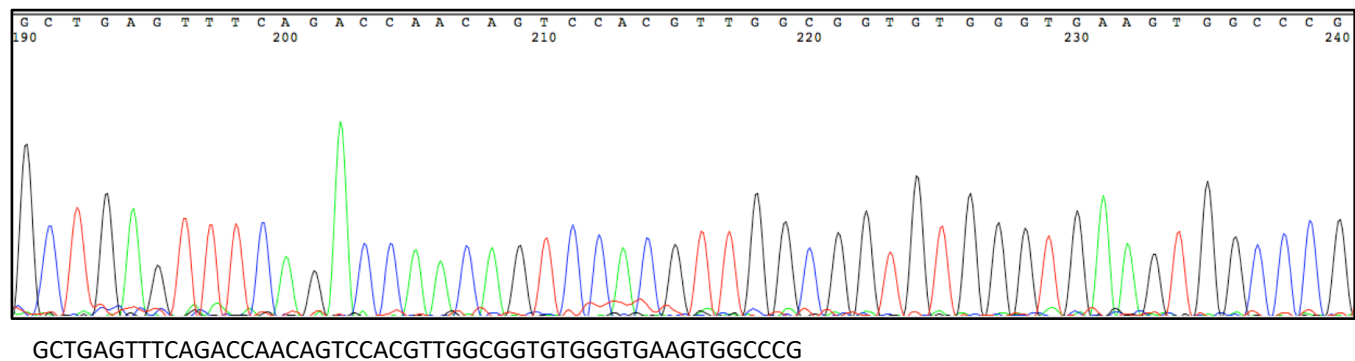

# Supplementary Figure 11

**a**

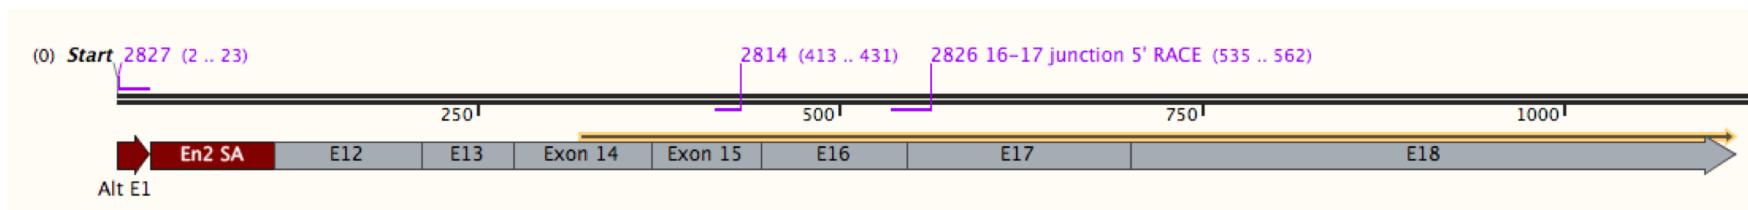

**Variant 1; 32.77 kDa**

MDCVITGRPCCIGTKGRCEITSREYCDFMRGYFHEEATLCSQVHCMDVDCGLLPFLNPEVPDQFYRLWLSLFLHAGILHCLVSVCFQMTVLRDLEKLAGWHRIAIIYLLSG  
ITGNLASAIFLPYRAEVPAGSQFGILACLFVELFQSWQILARPWRAFFKLLAVVLFLEFAFGLLPWIDNFAHISGFVSGFLFSFAFLPYISFGKFDLYRKRCQIIIFQVVFLGLLA  
GLVVLFFYFYPVRCEWCEFLTCIPFTDKFCEKYELDAQLH(EQKLISEEDLDYKDDDDK)

**b**

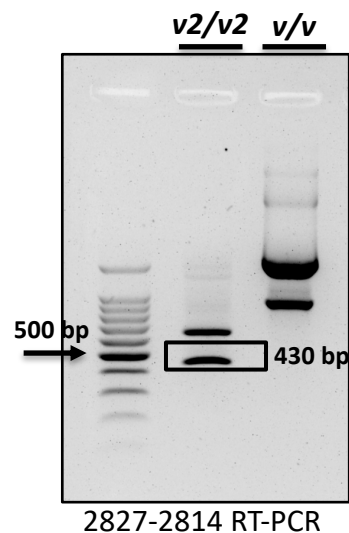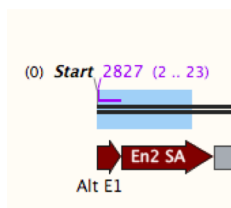

TGAGCCTCTGGAGCTGCTCAGCAGTGAAGGCTGTGCGAGGCCGCTT  
GTCCTCTTTGTTAGGGTTCTACTTCTTTCCAGCAGGTACA

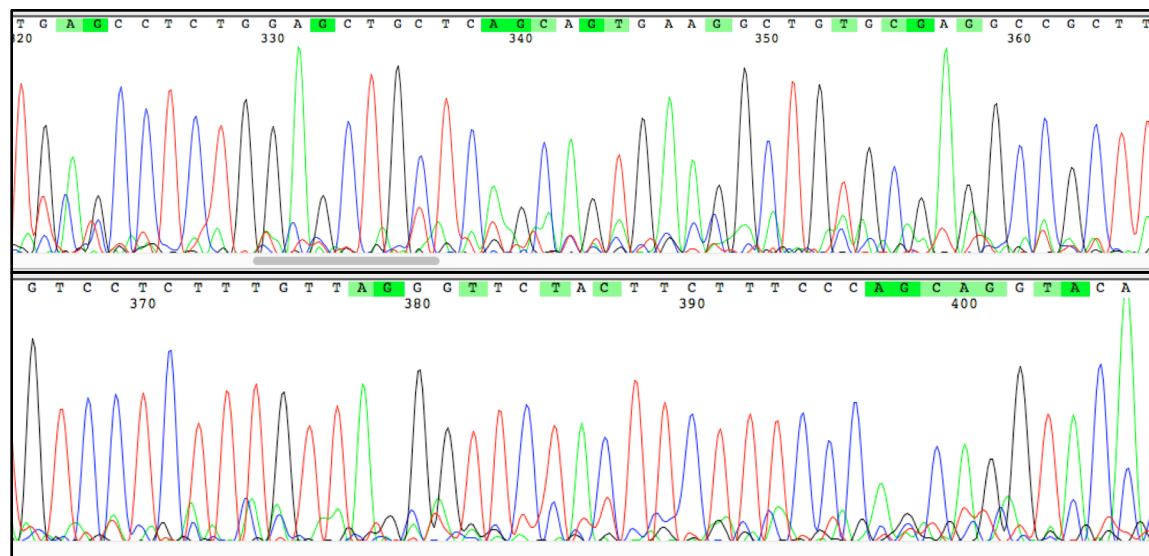

| Taq polymerase PCR   |        |      |            |
|----------------------|--------|------|------------|
| CYCLE STEP           | CYCLES | TEMP | TIME       |
| Initial denaturation | 1      | 95°C | 2 minutes  |
| Denaturation         | 30     | 95°C | 15 seconds |
| Annealing            |        | 52°C | 30 seconds |
| Extension            |        | 68°C | 2 minute   |
| Final extension      | 1      | 72°C | 5 minutes  |
| Hold                 | 1      | 4°C  | ∞          |

# Supplementary Figure 12

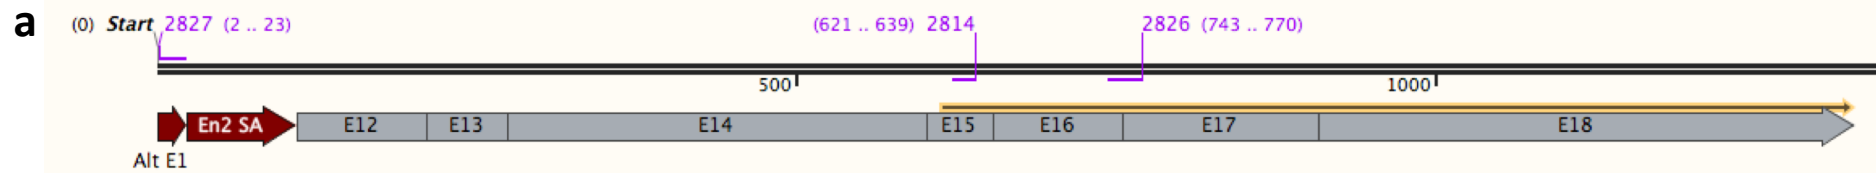

Variant 2; 29.6 kDa

MRGYFHEEATLCSQVHCMDDVCGLLPFLNPEVDPDQFYRLWLSLFLHAGILHCLVSVCFQMTVLRDLEKLAGWHRIAIYLLSGITGNLASAIFLPYRAEVGPAG  
 SQFGILACLFVELFQSWQILARPWRAFFKLLAVVLFLEAFGLLPWIDNFAHISGFVSGFLSFAFLPYISFGKFDLYRKRCQIIIFQVVFLGLLAGLVVLFYFYPVRC  
 WCEFLTICIPFTDKFCEKYELDAQLH(EQKLISEEDLDYKDDDDK)

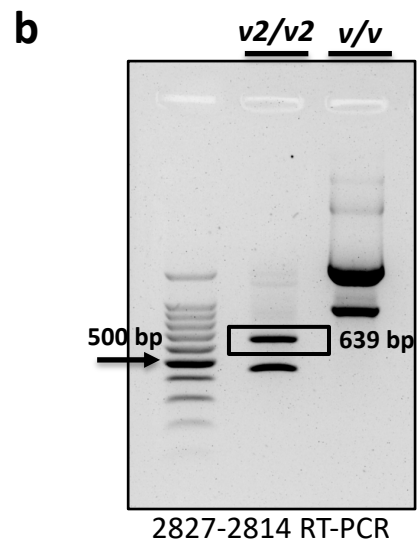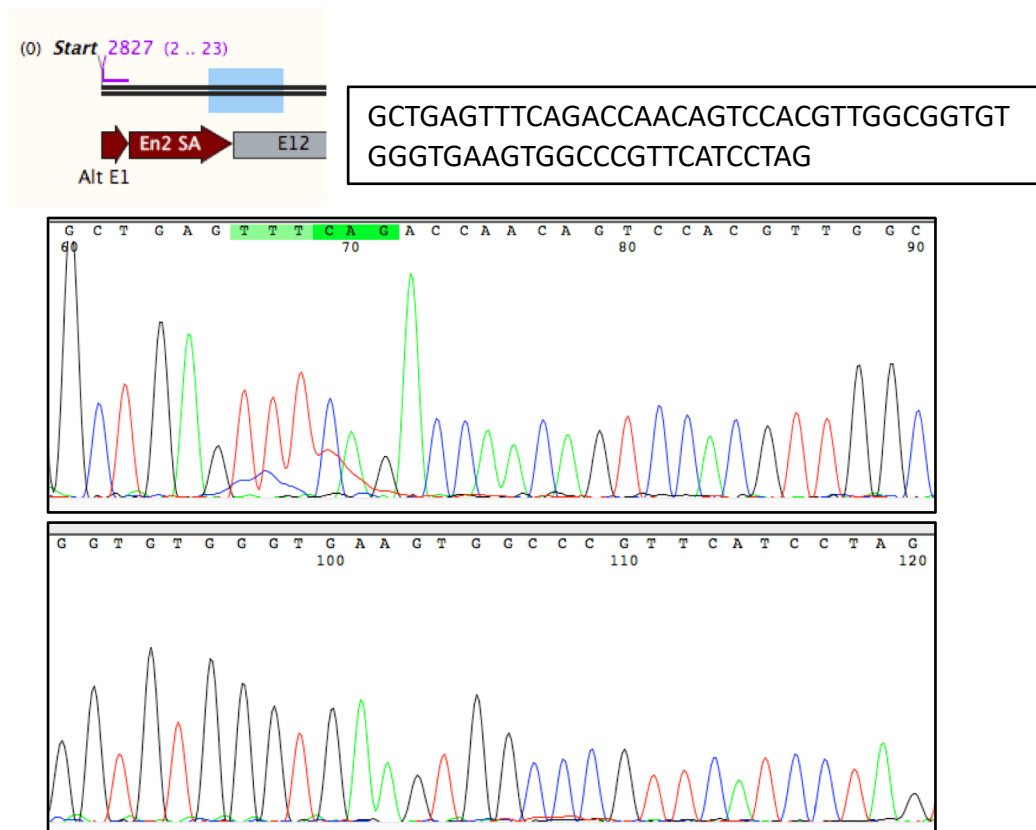

Supplementary Figure 13

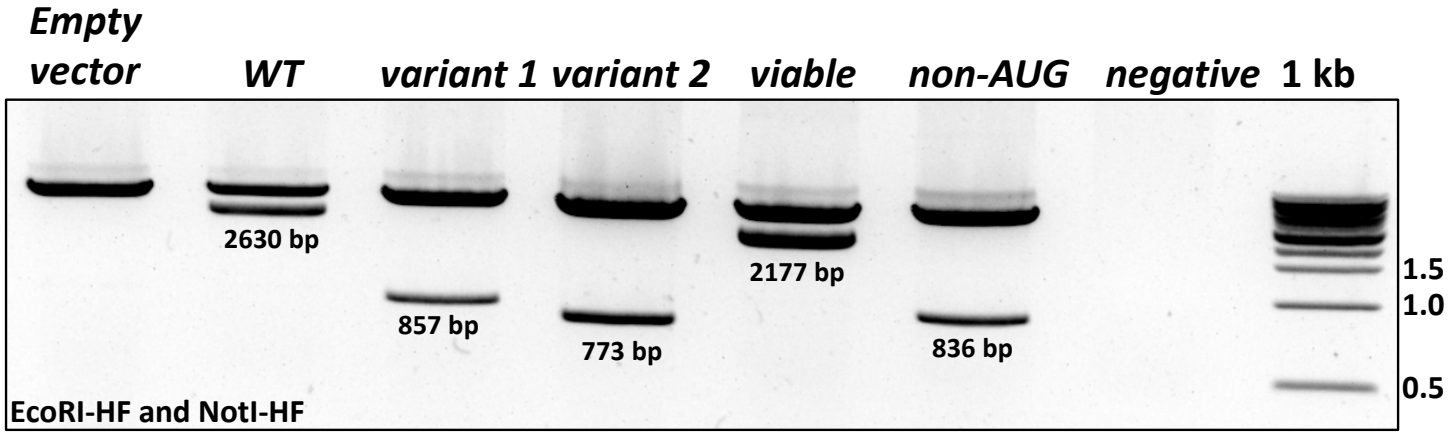

Supplementary Figure 14

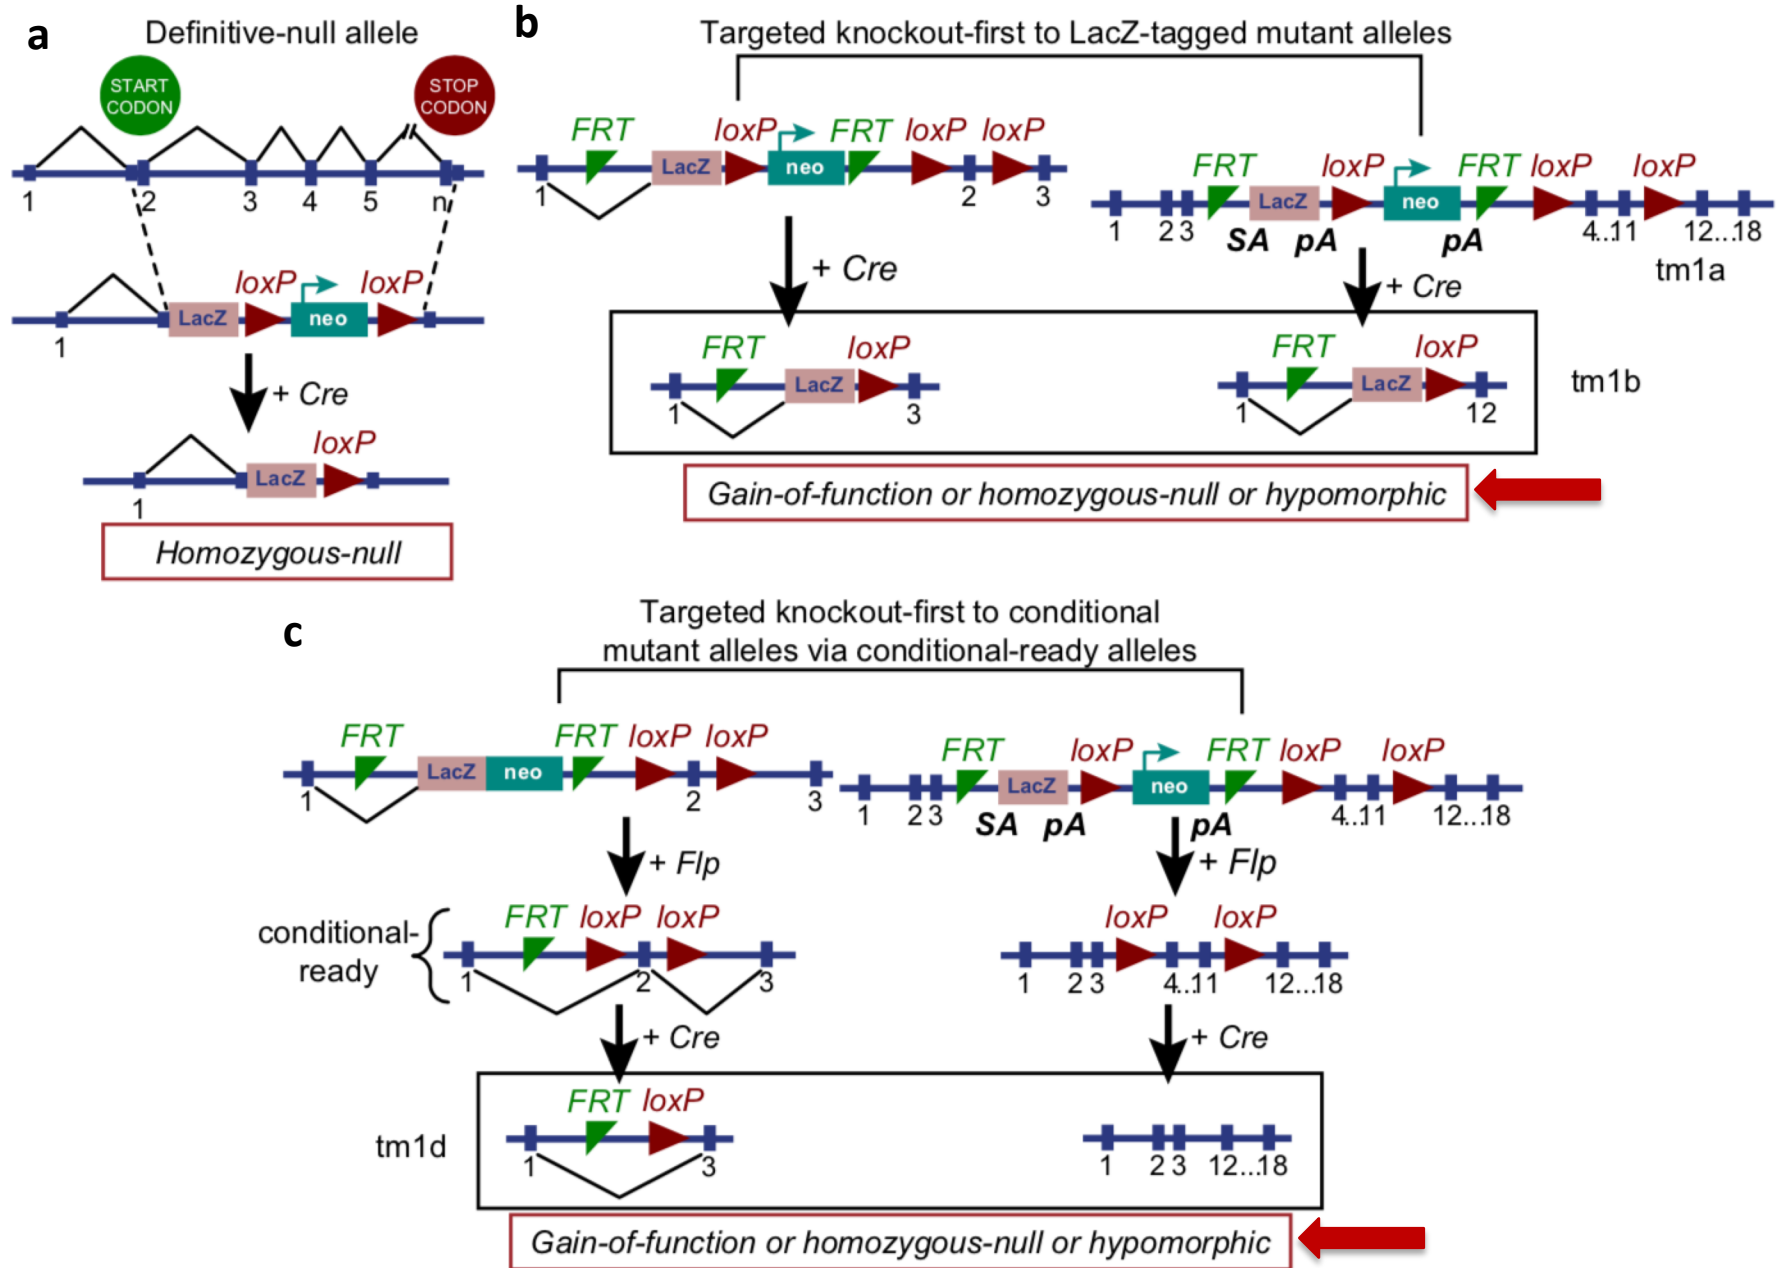



**a**

B6N(Cg)-*Rhbd1*<sup>tm1.1(KOMP)Vlcr/J</sup>

|        |                      |
|--------|----------------------|
| Wt For | GCTCAGGTTTCAACCGACTC |
| Wt Rev | CAGGGAAGTCCACCATGTCT |
| Mt For | CGCTCCCAGTCCATTATTG  |
| Mt Rev | CGGTCGCTACCATTACCACT |

| Taq polymerase PCR   |        |        |            |
|----------------------|--------|--------|------------|
| CYCLE STEP           | CYCLES | TEMP   | TIME       |
| Initial denaturation | 1      | 95°C   | 2 minutes  |
| Denaturation         | 30     | 95°C   | 15 seconds |
| Annealing            |        | 62.5°C | 30 seconds |
| Extension            |        | 68°C   | 2 minute   |
| Final extension      | 1      | 72°C   | 5 minutes  |
| Hold                 | 1      | 4°C    | ∞          |

**b**

*Rhbd2* KOMP allele

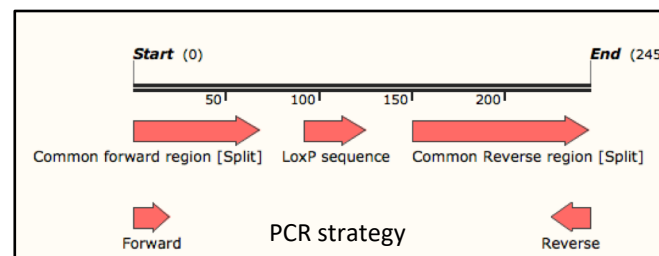

|         |                      |
|---------|----------------------|
| Forward | AGTAGCATCTCCCCGTGGAT |
| Reverse | AACCAATGGACCATGGACCC |

| Taq polymerase PCR   |        |      |            |
|----------------------|--------|------|------------|
| CYCLE STEP           | CYCLES | TEMP | TIME       |
| Initial denaturation | 1      | 95°C | 2 minutes  |
| Denaturation         | 30     | 95°C | 15 seconds |
| Annealing            |        | 55°C | 30 seconds |
| Extension            |        | 68°C | 2 minute   |
| Final extension      | 1      | 72°C | 5 minutes  |
| Hold                 | 1      | 4°C  | ∞          |

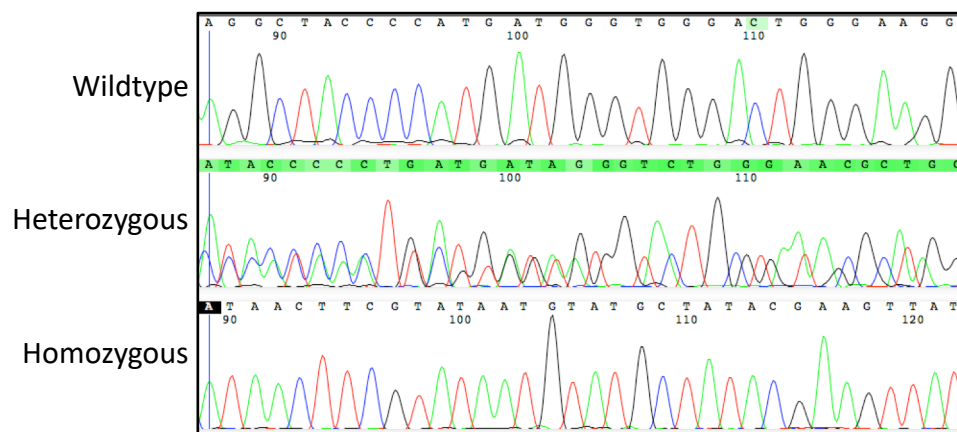

Supplement: Supplementary file [file media-8.pdf]
