# Supplementary material for: Genes adapt to outsmart gene targeting strategies in mutant mouse strains by skipping exons to reinitiate transcription and translation
Source: bioRxiv or medRxiv preprint supplement (doi:10.1101/2020.04.22.041087), 2020-04-23
Supplement: Supplementary file [file media-5.pdf]

| <b>Species</b> | <b>Gene(s)</b>  | <b>5' Incomplete</b> | <b>3' Incomplete</b> | <b>Approach</b> | <b>Reference</b> |
|----------------|-----------------|----------------------|----------------------|-----------------|------------------|
| Human          | <i>FLOT1</i>    | 5'                   | 3'                   | CRISPR/Cas9     | [1]              |
| Mouse          | <i>Gli3</i>     | -                    | 3'                   | CRISPR/Cas9     | [2]              |
| Human          | <i>TEAD1</i>    | 5'                   | 3'                   | Non-AUG start   | [3]              |
| Human          | <i>MRVI1</i>    | 5'                   | 3'                   | Non-AUG start   | [3]              |
| Human          | <i>PIM1</i>     | 5'                   | 3'                   | Non-AUG start   | [3]              |
| Human          | <i>EIF4G2</i>   | 5'                   | 3'                   | Non-AUG start   | [3]              |
| Human          | <i>MYC</i>      | -                    | 3'                   | Non-AUG start   | [3]              |
| Human          | <i>RARB</i>     | -                    | 3'                   | Non-AUG start   | [3]              |
| Human          | <i>TEAD4</i>    | 5'                   | 3'                   | Non-AUG start   | [3]              |
| Human          | <i>R3HCC1</i>   | 5'                   | 3'                   | Non-AUG start   | [3]              |
| Mouse          | <i>Cttnb1</i>   | 5'                   | 3'                   | CRISPR/Cas9     | [4]              |
| Human          | <i>LMNA</i>     | 5'                   | 3'                   | CRISPR/Cas9     | [4]              |
| Zebrafish      | <i>cd36</i>     | 5'                   | 3'                   | ENU             | [5]              |
| Zebrafish      | <i>pla2g12b</i> | 5'                   | -                    | ENU             | [5]              |
| Zebrafish      | <i>smyd1</i>    | 5'                   | -                    | CRISPR/Cas9     | [5]              |
| Human          | <i>PHACTR1</i>  | 5'                   | 3'                   | CRISPR/Cas9     | [6]              |
| Human          | <i>CTNNB1</i>   | 5'                   | 3'                   | CRISPR/Cas9     | [7]              |
| Human          | <i>AXIN1</i>    | 5'                   | 3'                   | CRISPR/Cas9     | [7]              |
| Human          | <i>LRP5</i>     | 5'                   | -                    | CRISPR/Cas9     | [7]              |
| Human          | <i>LRP6</i>     | 5'                   | 3'                   | CRISPR/Cas9     | [7]              |
| Human          | <i>PTEN</i>     | 5'                   | -                    | CRISPR/Cas9     | [7]              |
| Human          | <i>TBK1</i>     | -                    | 3'                   | CRISPR/Cas9     | [7]              |
| Human          | <i>BAP1</i>     | 5'                   | -                    | CRISPR/Cas9     | [7]              |
| Human          | <i>TLE3</i>     | 5'                   | 3'                   | CRISPR/Cas9     | [7]              |
| Human          | <i>PPM1A</i>    | -                    | 3'                   | CRISPR/Cas9     | [7]              |
| Human          | <i>BCL2L2</i>   | 5'                   | 3'                   | CRISPR/Cas9     | [7]              |
| Human          | <i>NGLY1</i>    | 5'                   | 3'                   | CRISPR/Cas9     | [8]              |
| Human          | <i>PI4KB</i>    | 5'                   | 3'                   | CRISPR/Cas9     | [8]              |
| Human          | <i>BRD4</i>     | 5'                   | 3'                   | CRISPR/Cas9     | [8]              |
| Human          | <i>BRD3</i>     | -                    | 3'                   | CRISPR/Cas9     | [8]              |
| Human          | <i>MTF2</i>     | 5'                   | 3'                   | CRISPR/Cas9     | [8]              |
| Human          | <i>BAZ2A</i>    | 5'                   | 3'                   | CRISPR/Cas9     | [8]              |

## References:

1. Kapahnke M, Banning A, Tikkanen R: **Random Splicing of Several Exons Caused by a Single Base Change in the Target Exon of CRISPR/Cas9 Mediated Gene Knockout.** *Cells* 2016, **5**.
2. Makino S, Fukumura R, Gondo Y: **Illegitimate translation causes unexpected gene expression from on-target out-of-frame alleles created by CRISPR-Cas9.** *Sci Rep* 2016, **6**:39608.
3. Diaz de Arce AJ, Noderer WL, Wang CL: **Complete motif analysis of sequence requirements for translation initiation at non-AUG start codons.** *Nucleic Acids Res* 2018, **46**:985-994.
4. Mou H, Smith JL, Peng L, Yin H, Moore J, Zhang XO, Song CQ, Sheel A, Wu Q, Ozata DM, et al: **CRISPR/Cas9-mediated genome editing induces exon skipping by alternative splicing or exon deletion.** *Genome Biol* 2017, **18**:108.
5. Anderson JL, Mulligan TS, Shen MC, Wang H, Scahill CM, Tan FJ, Du SJ, Busch-Nentwich EM, Farber SA: **mRNA processing in mutant zebrafish lines generated by chemical and CRISPR-mediated mutagenesis produces unexpected transcripts that escape nonsense-mediated decay.** *PLoS Genet* 2017, **13**:e1007105.
6. Lalonde S, Stone OA, Lessard S, Lavertu A, Desjardins J, Beaudoin M, Rivas M, Stainier DYR, Lettre G: **Frameshift indels introduced by genome editing can lead to in-frame exon skipping.** *PLoS One* 2017, **12**:e0178700.
7. Tuladhar R, Yeu Y, Tyler Piazza J, Tan Z, Rene Clemenceau J, Wu X, Barrett Q, Herbert J, Mathews DH, Kim J, et al: **CRISPR-Cas9-based mutagenesis frequently provokes on-target mRNA misregulation.** *Nat Commun* 2019, **10**:4056.
8. Smits AH, Ziebell F, Joberty G, Zinn N, Mueller WF, Clauder-Munster S, Eberhard D, Falth Savitski M, Grandi P, Jakob P, et al: **Biological plasticity rescues target activity in CRISPR knock outs.** *Nat Methods* 2019, **16**:1087-1093.
